# Supplementary material
Source: PubMed Central journal article supplement (PMC4561678)
Supplement: AEM.01686-15_zam999116584so1.pdf [file AEM.01686-15_zam999116584so1.pdf]

## 1    **Supplementary data set S1**

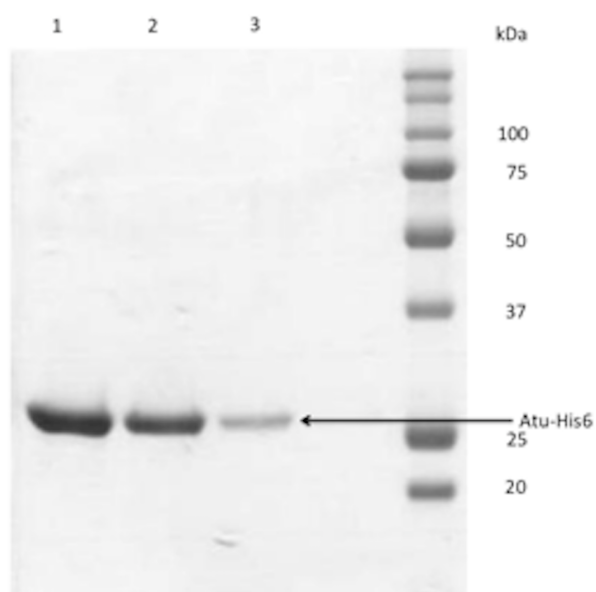

2

3    **A**

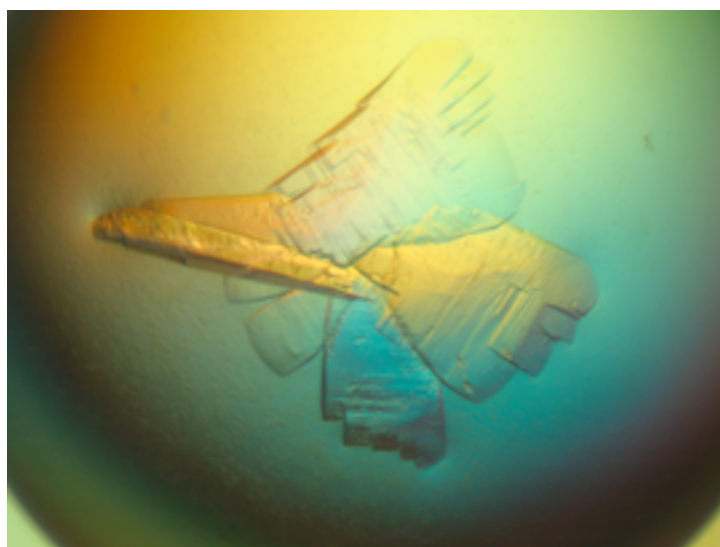

4

5    **B**

6    Supplementary Figure S1. **(A)** Purification of AtuE-His6. Lanes 1-3 show different  
7    amounts of purified AtuE-His6 on a 12% SDS-PAGE and subsequent staining with  
8    Coomassie brilliant blue. Note the absence of any visible impurities even at higher  
9    protein concentrations (35) **(B)** Cluster of AtuE crystals.

10

Sequence alignment of *P. aeruginosa* putative hydratases. The alignment shows 10 sequences (PA2890/1-264 to PA4980/1-263) aligned across 260 positions. The sequences are color-coded by residue type: A (green), C (blue), G (red), T (orange), and N (purple). The alignment is presented in blocks of 10 positions each, with the sequence identifier and position number on the left.

1 10 20 30 40 50 60

PA2890/1-264 . . . . . MSLPHCETLLLEPIEGVTITINRPQSRNAMSLAMVGE[RAVI]AAVRDDRS[VRALVIR]G.ADGH[F

PA4330/1-257 . . . . . MSELIRVERETGLITLRIDRQDKKNALTRAMYSRMAEALLEAQADTA[VRVVLIT]G.GDAC[F

PA0745/1-272 MNTAVEPYKASSFDLTHKLTVEKHGHTALITINHPPA.NTWDRDSLIG[RQLIEHLNRDDDIYALVVT]GQGPK[F

PA1021/1-253 . . . . . MSGLLQETRGTVRLIRFDNPARRNALSPALRME[LRAL]EAAECDDPS[IRSVLLTG].GEEV[F

PA1240/1-265 . . . . . MSEANSGPGRVTRFQRGH[LFL]IGLDRAGKRNAFDSAMLAD[ALAM]GEYERSEES[SRCAVIL]FAHGE.H[F

PA1629/1-261 . . . . . MSADPPSPVVLLEFFAAD[IALRL]NRPPQARNALNDEVQR[ASHF]QTLGADPA[IRVIVLT]GDS.RC[F

PA1748/1-229 . . . . . MSELISYQFEDG[IAITL]LINN.GKVN[AI]SPAVIDAF[NQALD]QALQDKAV[.VIVIT]GQ.PGIL[F

PA1821/1-270 . . . . . MTEYNARFVELADK[IAHVQ]INRPDKINAMNQDFWRE[IEIF]FRWDDTDE[VRVVL]SGAG.KH[F

PA2767/1-322 . . . . . MTLAPRH[LRIE]QRGRV[VLQVL]LDNPPA.[NFLT]TAVMQE[ADLLED]LEQRQD[IGAVIL]SGAADGV[F

PA2841/1-263 . . . . . MNDTLPGRI[ISERR]GH[LILL]GLDRVAKRNAFDLPMLDD[VAAL]GEYEADDQ[LRCALL]FAHGE.H[F

PA3426/1-256 . . . . . MSVIVERNGPV[ITLVI]ARPERRN[AVDR]PTAQALAD[ALREFE]ADD[IRVAVIL]GSG.GN[F

PA3591/1-265 . . . . . MDSSPGVVR[LERFE]QGV[ALLRL]NRP[AVL]NALNMRLEAL[AEHV]RLDECAD[IRVAVIL]GSG.GN[F

PA4980/1-263 . . . . . MTDLSF[QTRVE]AG[IAWLV]INRPQQR[NAID]IPTLEA[HVRI]DACERDPA[VRVVL]GSGGRS.[F

70 80 90 100

PA2890/1-264 CAGGDKDMAGARAA. . . . . GAEEAYRTLNRA. . . . . FGSLLEEAAQAP[QLLVA

PA4330/1-257 TS[GN]DLDFLEQPPS. . . . . LRDS. . . . . PVGRF. . . . . MSALLE. . . . . FPKFVIA

PA0745/1-272 SAGADLNMFPADGKA. . . . . RA. . . . . REMARR. . . . . FGEAFEALRDFR[GVSVIA

PA1021/1-253 CAGGDLGDMRVTELA. . . . . AGRARMQDN. . . . . ARLVROMQVRMG[KFLTIA

PA1240/1-265 TAGL[LME]LAPKLAA. . . . . SGFRYPDGGVD. . . . . PWGVVQPRRS. . . . . KFLVV

PA1629/1-261 AA[GD]RD[IST]STA[. . . . . GLY. . . . . GRH. . . . . GERWEATARCP[KFVIA

PA1748/1-229 SGGY[LKVM]T. . . . . SPENAVNLVAA. . . . . GSTLARLLSH[HYPIV

PA1821/1-270 AV[ER]KVAQGL[SV]ALACD[IV]CGAG. . . . . RFAGFGK[VGLLAD]LQ[HL]TPART[QW]GARQ[IL]MFGQV[EAE

PA2767/1-322 LTHFD[VE]LERAVASLTF[SM]PAWLTRILL[ES]ESLLRHLPGARKLLRRTLLAGVADMNLFHEVTAHMRMD[KFVIA

PA2841/1-263 TAGL[LAN]VGETFRQGWKLPEGAVDPWGTGG. . . . . RRP[SG]KELVV

PA3426/1-256 CAGAD[LA]VAEDGERRRNLEAG. . . . . DGPMGSPRMQLG[KFLTIA

PA3591/1-265 AACAD[LNE]LAESALEIQQRGV. . . . . ERHWQALAACR[KFLTIA

PA4980/1-263 CAGAD[LA]EWA[AAE]ARGELESYCWTEAA. . . . . HALMGRHLHALD[KFTVA

110 120 130 140 150 160 170

PA2890/1-264 LV[CAV]LGGG[FGL]ACVS[VA]AAAD. . . . . AQFGLPETS[LGL]LPAQ[IA]PFV[VR]R[IGL]TQ[ARR]ALTAA[RF]DGR[EA

PA4330/1-257 AVN[GP]AVGISTITLL[LL]HCD[VFV]GRRN. . . . . RLKMPFVN[LGL]TPEF[SSLL]LPRMLGHAKAAELLMLGQDFSGEQ[AA

PA0745/1-272 AIN[CY]AMGGGL[ECAL]ACD[RJA]ERQ. . . . . QMALPEAAVGLLPCA[STQ]ALPWL[VGEG]WAKRMILCNERVDAET[AA

PA1021/1-253 AV[ER]KVAQGL[SV]ALACD[IV]CGAG. . . . . RFAGFGK[VGLLAD]LQ[HL]TPART[QW]GARQ[IL]MFGQV[EAE

PA1240/1-265 AV[GT]CTW[AG]IELMLNAD[IA]VAARG. . . . . T.RFAHLEVLRLGIPPLG[STVR]FPRAAGTDM[AMRY]ILTGDE[FA]DAE[AA

PA1629/1-261 AVN[GP]AVGISTITLL[LL]HCD[VFV]GRRN. . . . . RLKMPFVN[LGL]TPEF[SSLL]LPRMLGHAKAAELLMLGQDFSGEQ[AA

PA1748/1-229 AC[CH]HAVA[KS]AFLL[LS]ADVR[IG]VDG. . . . . PFQIGLNEVA[IGMT]MHV[IGEL]ARDR[LKKS]AF[TRSV]N[AM]E[MF]SPA[AA

PA1821/1-270 AIN[CY]CIGCAID[LV]SACD[WR]YSTAD. . . . . QFSKEID[IGMA]ADV[TLQ]RLIPRI[IGD]GM[MR]LE[AYT]GRMVD[GEE[AA

PA2767/1-322 AIN[CY]CIGCAID[LV]SACD[WR]YSTAD. . . . . QFSKEID[IGMA]ADV[TLQ]RLIPRI[IGD]GM[MR]LE[AYT]GRMVD[GEE[AA

PA2841/1-263 AV[GT]CTW[AG]IELMLNAD[IA]VAARG. . . . . T.RFAHLEVLRLGIPPLG[STVR]FPRAAGTDM[AMRY]ILTGDE[FA]DAE[AA

PA3426/1-256 AIN[CY]CIGCAID[LV]SACD[WR]YSTAD. . . . . QFSKEID[IGMA]ADV[TLQ]RLIPRI[IGD]GM[MR]LE[AYT]GRMVD[GEE[AA

PA3591/1-265 AVN[GP]AVGISTITLL[LL]HCD[VFV]GRRN. . . . . RLKMPFVN[LGL]TPEF[SSLL]LPRMLGHAKAAELLMLGQDFSGEQ[AA

PA4980/1-263 AVN[GP]AVGISTITLL[LL]HCD[VFV]GRRN. . . . . RLKMPFVN[LGL]TPEF[SSLL]LPRMLGHAKAAELLMLGQDFSGEQ[AA

180 190 200 210 220 230 240 250

PA2890/1-264 LR[LGL]VHF[CE]ADADA[EQ]R[TE]TT[EQ]RRCA[FN]ANAAT[KA]L[LA]SESGELGAL[DDA]ARQFAE[AVG]GA[GS]G[GT]L

PA4330/1-257 AANG[LI]ANAAL[ED]GATV[LE]HARD[AA]RRF[HL]AF[SA]VVES[XRL]MKAPFIEELRRV[IA]EEGDI[FT]STR[LR]S[PE]AT[HA]IS

PA0745/1-272 LR[LGL]VHF[CE]ADADA[EQ]R[TE]TT[EQ]RRCA[FN]ANAAT[KA]L[LA]SESGELGAL[DDA]ARQFAE[AVG]GA[GS]G[GT]L

PA1021/1-253 LR[LGL]VHF[CE]ADADA[EQ]R[TE]TT[EQ]RRCA[FN]ANAAT[KA]L[LA]SESGELGAL[DDA]ARQFAE[AVG]GA[GS]G[GT]L

PA1240/1-265 LR[LGL]VHF[CE]ADADA[EQ]R[TE]TT[EQ]RRCA[FN]ANAAT[KA]L[LA]SESGELGAL[DDA]ARQFAE[AVG]GA[GS]G[GT]L

PA1629/1-261 LR[LGL]VHF[CE]ADADA[EQ]R[TE]TT[EQ]RRCA[FN]ANAAT[KA]L[LA]SESGELGAL[DDA]ARQFAE[AVG]GA[GS]G[GT]L

PA1748/1-229 LR[LGL]VHF[CE]ADADA[EQ]R[TE]TT[EQ]RRCA[FN]ANAAT[KA]L[LA]SESGELGAL[DDA]ARQFAE[AVG]GA[GS]G[GT]L

PA1821/1-270 LR[LGL]VHF[CE]ADADA[EQ]R[TE]TT[EQ]RRCA[FN]ANAAT[KA]L[LA]SESGELGAL[DDA]ARQFAE[AVG]GA[GS]G[GT]L

PA2767/1-322 LR[LGL]VHF[CE]ADADA[EQ]R[TE]TT[EQ]RRCA[FN]ANAAT[KA]L[LA]SESGELGAL[DDA]ARQFAE[AVG]GA[GS]G[GT]L

PA2841/1-263 LR[LGL]VHF[CE]ADADA[EQ]R[TE]TT[EQ]RRCA[FN]ANAAT[KA]L[LA]SESGELGAL[DDA]ARQFAE[AVG]GA[GS]G[GT]L

PA3426/1-256 LR[LGL]VHF[CE]ADADA[EQ]R[TE]TT[EQ]RRCA[FN]ANAAT[KA]L[LA]SESGELGAL[DDA]ARQFAE[AVG]GA[GS]G[GT]L

PA3591/1-265 LR[LGL]VHF[CE]ADADA[EQ]R[TE]TT[EQ]RRCA[FN]ANAAT[KA]L[LA]SESGELGAL[DDA]ARQFAE[AVG]GA[GS]G[GT]L

PA4980/1-263 LR[LGL]VHF[CE]ADADA[EQ]R[TE]TT[EQ]RRCA[FN]ANAAT[KA]L[LA]SESGELGAL[DDA]ARQFAE[AVG]GA[GS]G[GT]L

260

PA2890/1-264 AFV[QK]RKPPV[WAQ]. . . . .

PA4330/1-257 AFM[HR]RQPD[FSR]FA. . . . .

PA0745/1-272 AFLEK[RD]PK[WR]NC. . . . .

PA1021/1-253 AFLAK[RP]PV[FR]GN. . . . .

PA1240/1-265 AMV[QK]RAPAF[KGR]. . . . .

PA1629/1-261 AFLEK[RP]PNY[QK]. . . . .

PA1748/1-229 . . . . .

PA1821/1-270 AHMAK[QK]PE[AD]. . . . .

PA2767/1-322 EYIERV[RT]ITREERPFRADEFDDLTEGNAIDMAYR

PA2841/1-263 ALQER[RP]GFEOR. . . . .

PA3426/1-256 RFDGEG[RR]HGRFE. . . . .

PA3591/1-265 AFLEK[RT]AEY[LGK]. . . . .

PA4980/1-263 AVAEK[RS]PQ[SGR]. . . . .

11

12

13 Supplementary Figure S2. Sequence alignment of *P. aeruginosa* putative hydratases.

14

**Supplementary data set: *P. aeruginosa* proteins identified in the GeLC-MS/MS**

**approach.** Results from the GeLC-MS/MS experiment are shown on different Excel sheets as indicated at the bottom: all identified proteins, proteins that showed a significantly increased abundance in the presence of octanoate, proteins that showed a significantly increased abundance in the presence of citronellate. Proteins exhibiting a change in abundance  $\geq 3$  and a p-value  $\leq 0.05$  were considered as differentially abundant.

The tables show the fold-change, p-value and the “number of peptides used for quantification” as well as identifiers (Locus-Tag, NCBI accession number, gene name) for each protein identified. In addition metadata like subcellular localization, putative function, MW and pI as retrieved from the “Pseudomonas Genome Database” are given for each protein. Only proteins with 80% peptide- and 99% protein-probability (see materials and methods) and a minimum number of two peptides per protein are listed.
